# Supplementary material for: Kinase-Inactivated EGFR Is Required for the Survival of Wild-Type EGFR-Expressing Cancer Cells Treated with Tyrosine Kinase Inhibitors
Source: MDPI journal article supplement (doi:10.3390/ijms20102515), 2019-05-22
Supplement: s1 [file s1]

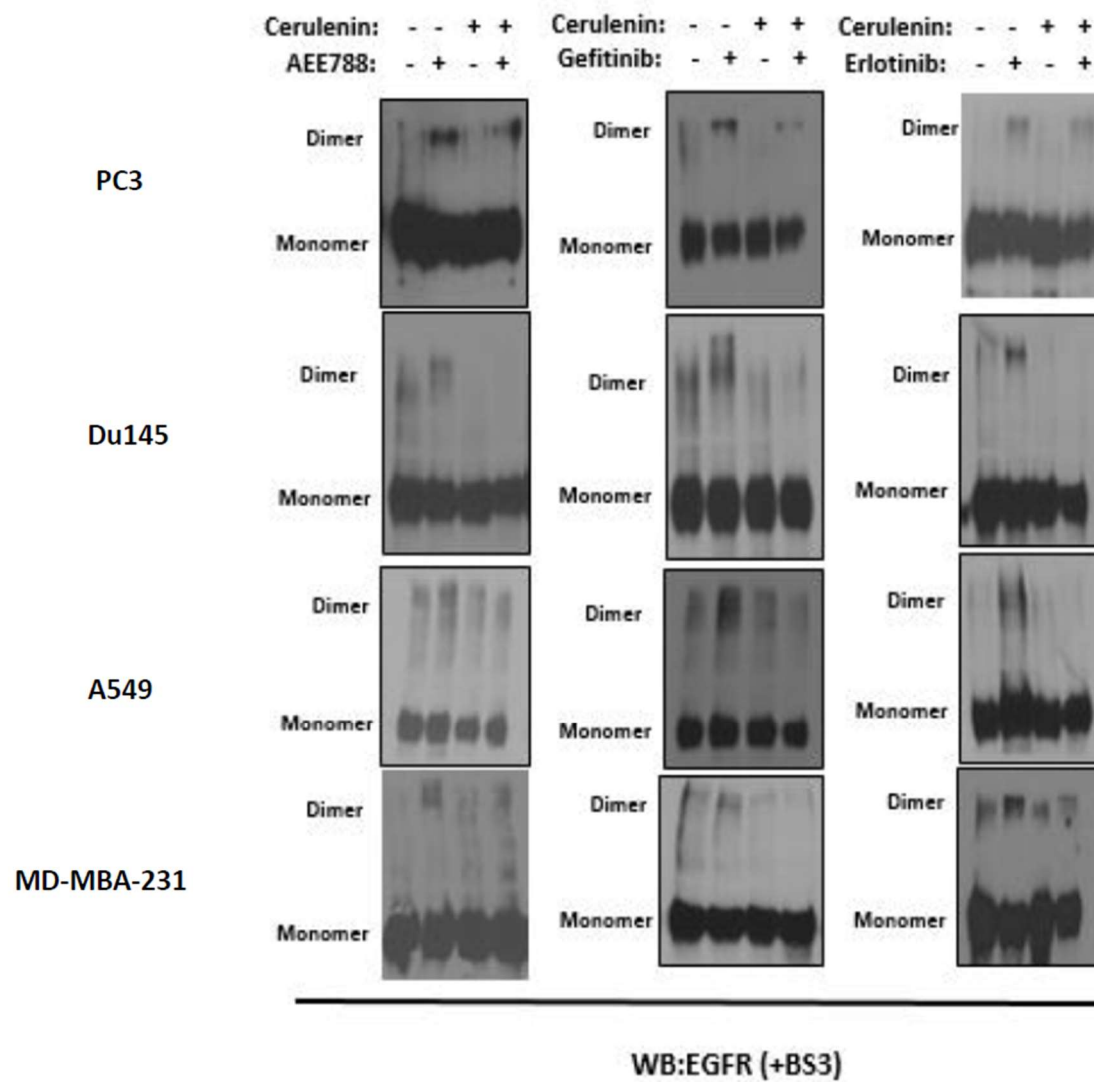

**Figure S1.** Inhibition of fatty acid synthase-dependent *de novo* palmitate synthesis impedes TKI-induced EGFR dimerization. Cells were pretreated with fatty acid synthase (FASN) inhibitor (cerulenin) at a concentration of 5  $\mu\text{g/mL}$  for 6 h in serum-free media. Following pretreatment, fresh media was added and the cells were treated with respective TKIs (AEE788, gefitinib, and erlotinib) at a final concentration of 5  $\mu\text{M}$  for 24 h. The degree of EGFR dimerization was analyzed following crosslinking using BS3. The cell lysates were resolved on SDS PAGE gel in reducing conditions followed by Western blot.

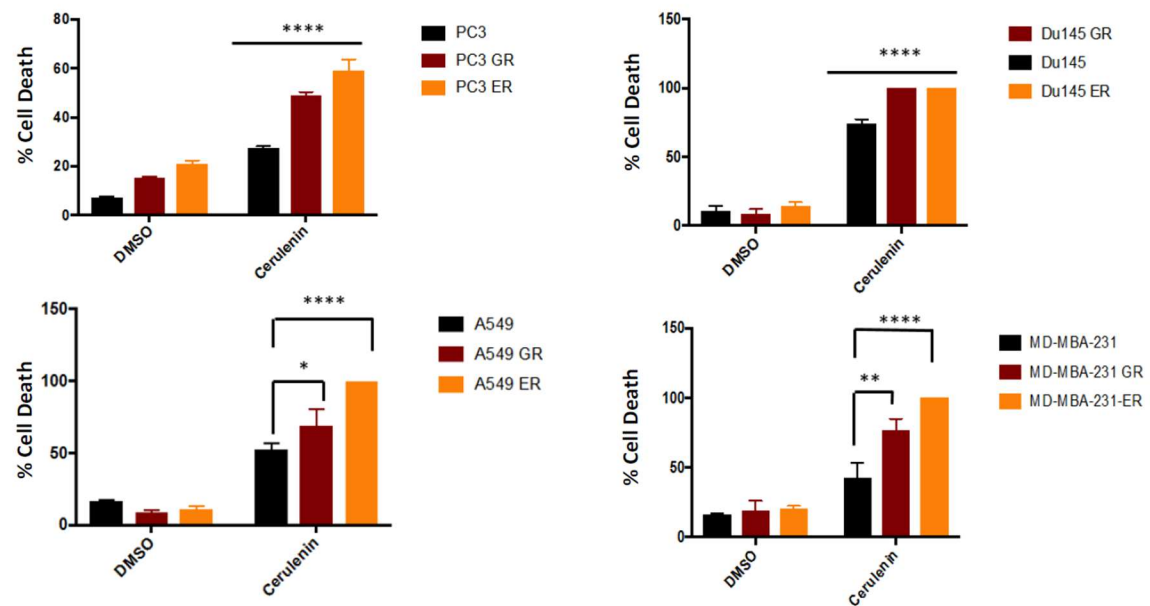

**Figure S2.** Inhibition of fatty acid synthase increases cytotoxicity in EGFR-TKI-resistant cells. GR and ER cells were seeded on 6-well plates along with respective non-treated parental controls. Once the cells were 80% confluent, the cells were treated with cerulenin (5  $\mu\text{g/mL}$ ) for 72 h in serum-free media. Equal volumes of cell suspension was incubated with 0.4% trypan blue to obtain 1:2 dilution. Cells were counted using a hemacytometer and percent cell death calculated. Results were triplicated  $\pm$  SD and were pooled into treatment groups. One-way ANOVA and Tukey's multiple comparison test was used for statistical analyses, \*  $p < 0.05$ , \*\*  $p < 0.001$ , \*\*\*  $p < 0.0001$ .
